# Supplementary material for: Mobilizing COVID-19 Vaccination Partnerships for Newcomer Refugees and Immigrants in the Calgary, Canada area, 2021-2022
Source: Research Square preprint supplement (doi:10.21203/rs.3.rs-5664906/v1), 2024-12-20
Supplement: Supplementary file 1 [file 9a081c60036383d722b357a4.docx]

**APPENDIX**

Verbatim examples of service design, advocacy, and interpretation, outreach and information provision conducted by partnerships.

| **Strategies and Actions** | **Verbatim Quote** |
| --- | --- |
| **Service Design** | ‘We had music playing all the time, we had a video screen up, we created an environment that was very calming. Families could sit together at big tables. Sometimes we had ten chairs at one vaccinator’s table, and [the nurse] would vaccinate all ten family members together. We didn't want to be inefficient, but we wanted to be welcoming and so there was a very strategic design to make that happen and to make it feel comfortable. We spread out the appointments so [...] you never had to wait very long. You got greeted in a parking lot and shown where to park and then you got walked to the door and then you got walked to the next point. There was always a human to guide you through.’ (Key informant 02)  ‘If we are not compassionate enough, and we are unable to understand them... vaccination probably is only taking a few minutes to be done, but in long term we are going to lose that trust. These groups of people are very traumatized. Their mental well-being is not really the best, and if we are unable as a health care provider, we are unable to detect that, and address that.. they wouldn't be very enthusiastic to get the vaccine. Not only the [COVID-19] vaccine, it could be for anything else in the future.’ (Key informant 08)  ‘We used to provide services to some people, provide them with transportation. Limited number of people that provide you with transportation that are really in need. So, it's not like everyone, we can provide them with transportation, so we started with some, we talked to them, we tried to understand like do they have some kind of issue like medical conditions. So we provide them transportation going back and forth. The clinic was really busy like that.’ (Key informant participant 01)  ‘[IMGs] together with our staff provided these orientations on the vaccines to many groups of clients and then after that was done, being booked in with [the clinic]. So I think that project helps reduce a significant barrier in accessing vaccines for newcomers. And I had volunteered at [the clinic] later [...] I did see a large number of [these previous patients] coming in to get the vaccine.’ (Key informant 06) |
| **Advocacy** | ‘Alberta was relatively limited in its deployment of community-based vaccination clinics compared to other provinces. You know the vaccine rollout in Alberta was primarily driven initially by pharmacies and public health. Later on primary care like family doctors were given permission to get vaccines and then later, later on, like we are able to do these mobile vaccination clinics through a medical [provider] all over the province, but we are much lower than the other provinces in terms of just like I guess like vaccine deployment.’ (Key informant 13)  ‘Our advocacy was to bring the vaccines closer to where people are […] to make it less painful to go and cost less. You know, easier access for people, both physically as well as requirements.’ (Key informant 07)  ‘With the kids' vaccination, it was such a low rate because nobody wants to do anything differently… No approval came through for schools [even though] these are good places for vaccination.’ (Key informant 11)  ‘We are fortunate that we can afford to do this at this point in time, because it's under the guise of COVID […] the funding is there to do it because it's COVID. Under normal circumstances, if it wasn't COVID and we do have some budget we carve it out of one of our community health centers [...]. Their specific funding that I year mark for doing the refugee [work], but it is kind of additional work outside of our routine work [...].’ (Key informant 12) |
| **Interpretation, Outreach, and Information Provision** | ‘I remember it was [...] not only vaccination. We had Ramadan going on, so we had the Zoom meetings, and there were lots of [refugees] who attended those meetings on the importance of fasting and if they had diabetes, or they were pregnant or just so. I mean, there are many different health issues that are important, and they need to be addressed whenever, like a group of people are arriving.’ (Key informant 08)  ‘We had extremely good partnerships [for specific population groups]. They called, they advertised… they found volunteers everywhere, went to houses, went to community, the churches, the yard sales. All those kinds of things and had signs and advertising. And so we had a ton of partners that did that work […] like we just had so many partners that did the work for us and got them in the door for us.’ (Key informant 02)  ‘Individuals of [grassroots and community] organizations, they have the capacity. Not just the linguistic capacities. They also have the cultural abilities. They had the knowledge of their communities. They knew exactly what needed to be done.’ (Key informant 10) |
